# Supplementary material
Source: HighWire-hosted journal article supplement (https://rapm.bmj.com/highwire/filestream/17264/field_highwire_adjunct_files/0/rapm-2021-103031supp001_data_supplement.pdf)
Supplement: rapm-2021-103031supp001_data_supplement.pdf [file rapm-2021-103031supp001_data_supplement.pdf]

Appendix table 1. Societies participating in the cervical spine joint pain consensus practice guidelines

| <b>Society</b>                                                 | <b>Representative(s)</b>          |
|----------------------------------------------------------------|-----------------------------------|
| Chairpersons                                                   | Steven P. Cohen, Robert W. Hurley |
| American Society of Regional Anesthesia & Pain Medicine (ASRA) | Samer Narouze, Andrea Chadwick    |
| American Academy of Pain Medicine (AAPM)                       | W. Michael Hooten, Jennifer Hah   |
| American Academy of Neurology (AAN)                            | Narayan Kissoon                   |
| American Academy of Physical Medicine & Rehabilitation (AAPMR) | David W. Lee                      |
| American Interventional Headache Society (AHIS)                | Meredith Barad                    |
| American Society of Anesthesiologists (ASA)                    | Meredith C.B. Adams               |
| American Society of Pain and Neuroscience (ASPN)               | Timothy R. Deer                   |
| Belgian Society of Anesthesiology and Reanimation (BSAR-APSAR) | Jan van Zundert                   |
| British Pain Society                                           | Arun Bhaskar                      |
| Canadian Pain Society                                          | Anuj Bhatia                       |
| U.S. Department of Defense (DoD)                               | Sara M. Wilson                    |
| Dutch Society of Anesthesiology                                | Maarten van Eerd                  |
| Korean Pain Society (KPS)                                      | Jee Youn Moon                     |
| North American Neuromodulation Society (NANS)                  | David A. Provenzano               |
| North American Spine Society (NASS)                            | Byron J. Schneider                |
| Spine Intervention Society (SIS)                               | Zachary L. McCormick              |
| U.S. Department of Veterans Affairs                            | Zirong Zhao                       |
| World Institute of Pain (WIP)                                  | Jan van Zundert                   |
| Ad hoc member (former representative of American Pain Society) | Mark S. Wallace                   |
